# Supplementary material
Source: PubMed Central journal article supplement (PMC6760904)
Supplement: NIHMS1046388-supplement-Appendix_A.pdf [file NIHMS1046388-supplement-Appendix_A.pdf]

Burden associated with nonfatal slip and fall injuries in the surface stone, sand, and gravel mining industry

Supplemental Data A

Table A-1: Non-fatal injury incidence rates based on Mine Safety and Health Administrations accident/injury classification across various mining commodities

| Accident/Injury Classification (All)                      | Non-fatal Injury Incidence Rate (per 10,000 FTE) |     |       |      |          |      |                         |     |       |     |
|-----------------------------------------------------------|--------------------------------------------------|-----|-------|------|----------|------|-------------------------|-----|-------|-----|
|                                                           | Coal                                             |     | Metal |      | Nonmetal |      | Stone, sand, and gravel |     | Total |     |
|                                                           | Mean                                             | SD* | Mean  | SD*  | Mean     | SD*  | Mean                    | SD* | Mean  | SD* |
| Handling materials                                        | 117.5                                            | 4.7 | 82.5  | 11.4 | 85.9     | 16.3 | 90.4                    | 9.6 | 97.7  | 9.0 |
| Slip or fall of person                                    | 68.5                                             | 5.0 | 50.8  | 8.9  | 52.8     | 11.4 | 52.9                    | 7.4 | 57.8  | 7.3 |
| Hand tools                                                | 40.4                                             | 4.9 | 26.6  | 4.6  | 26.1     | 5.5  | 37.5                    | 5.5 | 35.6  | 5.2 |
| Machinery                                                 | 37.9                                             | 8.2 | 25.8  | 7.6  | 21.9     | 6.7  | 24.0                    | 5.3 | 29.1  | 7.0 |
| Powered Haulage                                           | 32.6                                             | 5.6 | 18.5  | 3.5  | 16.8     | 4.1  | 16.5                    | 2.2 | 22.6  | 3.9 |
| Fall of roof, back or brow                                | 29.7                                             | 6.2 | 4.6   | 2.4  | 2.0      | 0.9  | 0.3                     | 0.2 | 11.6  | 3.7 |
| Other                                                     | 4.5                                              | 1.0 | 8.0   | 1.1  | 7.3      | 2.5  | 8.3                     | 1.6 | 6.8   | 1.1 |
| Stepping or kneeling on object                            | 6.9                                              | 1.1 | 4.9   | 1.2  | 3.9      | 1.4  | 4.6                     | 1.0 | 5.4   | 0.9 |
| Striking or bumping                                       | 6.1                                              | 1.3 | 2.5   | 0.8  | 2.0      | 1.0  | 2.5                     | 0.9 | 3.7   | 0.9 |
| Fall of face, rib, pillar, side or highwall               | 7.2                                              | 2.2 | 1.7   | 1.1  | 0.7      | 0.6  | 0.3                     | 0.2 | 3.1   | 1.2 |
| Electrical                                                | 2.3                                              | 0.4 | 1.2   | 0.8  | 1.7      | 1.0  | 1.2                     | 0.6 | 1.6   | 0.3 |
| Exploding vessels under pressure                          | 1.4                                              | 0.6 | 1.2   | 0.9  | 1.1      | 0.6  | 0.9                     | 0.3 | 1.1   | 0.3 |
| Falling, Rolling or sliding rock or materials of any kind | 1.2                                              | 0.5 | 0.8   | 0.6  | 0.6      | 0.6  | 0.9                     | 0.4 | 1.0   | 0.4 |
| Nonpowered Haulage                                        | 0.5                                              | 0.3 | 1.0   | 0.8  | 0.8      | 0.6  | 0.7                     | 0.4 | 0.7   | 0.3 |
| Fire                                                      | 0.4                                              | 0.2 | 0.4   | 0.3  | 0.6      | 0.7  | 0.5                     | 0.3 | 0.5   | 0.2 |
| Ignition or explosion of gas or dust                      | 0.3                                              | 0.3 | 0.3   | 0.3  | 0.3      | 0.4  | 0.3                     | 0.2 | 0.3   | 0.1 |
| Hoisting                                                  | 0.1                                              | 0.1 | 0.3   | 0.2  | 0.5      | 0.4  | 0.1                     | 0.1 | 0.2   | 0.1 |
| Explosives and breaking agents                            | 0.1                                              | 0.1 | 0.2   | 0.3  | 0.0      | 0.1  | 0.1                     | 0.2 | 0.1   | 0.1 |
| Entrapment                                                | 0.0                                              | 0.0 | 0.0   | 0.0  | 0.0      | 0.0  | 0.0                     | 0.1 | 0.0   | 0.0 |
| Inundation                                                | 0.0                                              | 0.0 | 0.0   | 0.1  | 0.0      | 0.0  | 0.0                     | 0.0 | 0.0   | 0.0 |

\*: Standard Deviation

Table A-2: Non-fatal injury incidence rates based on Mine Safety and Health Administrations accident type or event across various mining commodities

| Accident Type or Event (ATYPE) (Recoded to 10 categories) | Non-fatal Injury Incidence Rate (per 10,000 FTE) |      |       |      |          |      |                         |      |       |      |
|-----------------------------------------------------------|--------------------------------------------------|------|-------|------|----------|------|-------------------------|------|-------|------|
|                                                           | Coal                                             |      | Metal |      | Nonmetal |      | Stone, sand, and gravel |      | Total |      |
|                                                           | Mean                                             | SD*  | Mean  | SD*  | Mean     | SD*  | Mean                    | SD*  | Mean  | SD*  |
| Struck by or against                                      | 171.0                                            | 22.9 | 91.9  | 16.7 | 77.6     | 13.9 | 92.2                    | 11.4 | 118.6 | 18.9 |
| Overexertion                                              | 85.8                                             | 4.7  | 59.9  | 8.6  | 66.6     | 12.9 | 65.4                    | 8.1  | 71.4  | 7.0  |
| Fall                                                      | 44.8                                             | 4.5  | 33.1  | 7.4  | 36.4     | 8.9  | 37.0                    | 6.6  | 38.9  | 6.3  |
| Caught in, under, or between                              | 44.7                                             | 4.8  | 27.5  | 6.4  | 28.8     | 6.9  | 30.3                    | 3.1  | 34.8  | 4.9  |
| Exposure to noxious substances                            | 2.7                                              | 0.6  | 9.3   | 2.8  | 5.7      | 1.7  | 6.1                     | 0.6  | 5.4   | 0.6  |
| Contact with                                              | 3.5                                              | 0.8  | 4.0   | 1.6  | 4.7      | 1.8  | 5.2                     | 1.4  | 4.3   | 0.9  |
| Bodily reaction NEC~                                      | 2.3                                              | 1.0  | 3.3   | 1.0  | 2.6      | 1.3  | 2.7                     | 0.9  | 2.6   | 0.7  |
| Flash burns                                               | 1.5                                              | 0.4  | 0.9   | 0.6  | 1.5      | 0.9  | 1.5                     | 0.5  | 1.4   | 0.3  |
| Unclassified or NEC~                                      | 0.6                                              | 0.2  | 1.1   | 0.6  | 0.8      | 0.7  | 1.1                     | 0.6  | 0.9   | 0.4  |
| Rubbed or abraded NEC~                                    | 0.7                                              | 0.3  | 0.2   | 0.3  | 0.2      | 0.3  | 0.6                     | 0.2  | 0.5   | 0.2  |

\*: Standard Deviation

~: not elsewhere classified

**Table A-3: Non-fatal slip, trip, and fall injury incidence rates by operating location across various mining commodities**

| Operating Location (Recoded to 5 categories) | Slip, trip, and fall Injury Incidence Rate (per 10,000 FTE) |     |       |      |          |      |                          |      |       |      |
|----------------------------------------------|-------------------------------------------------------------|-----|-------|------|----------|------|--------------------------|------|-------|------|
|                                              | Coal                                                        |     | Metal |      | Nonmetal |      | Stone, sand, and gravel~ |      | Total |      |
|                                              | Mean                                                        | SD* | Mean  | SD*  | Mean     | SD*  | Mean                     | SD*  | Mean  | SD*  |
| <b>Underground mining<sup>1</sup></b>        | 90.7                                                        | 7.9 | 69.6  | 14.4 | 79.9     | 27.8 | 77.6                     | 12.8 | 86.5  | 8.6  |
| <b>Pit<sup>2</sup></b>                       | 49.0                                                        | 8.8 | 51.5  | 13.3 | 59.0     | 11.3 | 59.3                     | 7.5  | 55.1  | 7.2  |
| <b>Plant<sup>3</sup></b>                     | 71.3                                                        | 7.4 | 57.9  | 10.1 | 59.1     | 15.0 | 66.9                     | 14.1 | 64.1  | 11.9 |
| <b>Office</b>                                | 9.5                                                         | 5.9 | 7.7   | 3.9  | 4.0      | 2.2  | 7.2                      | 1.8  | 7.0   | 1.6  |

\*: Standard Deviation

~: Sand and gravel mines do not have underground, shops and yards, or plants. Incidence Rates for those locations only represent stone mines.

<sup>1</sup>: Underground operations and surface shops, yards, and tipple at underground mines

<sup>2</sup>: Includes strip, open pit mines and dredge operations. Surface mining for coal also includes auger mining and reworking of mine dumps. Surface mining for metal and nonmetal also include brine pumping.

<sup>3</sup>: Mill, preparation plant or breaker operations and associated shops and yards and independent shops and yards not associated with a mine
